# Supplementary material for: Clinical and Molecular Comparative Study of Colorectal Cancer Based on Age-of-Onset and Tumor Location: Two Main Criteria for Subclassifying Colorectal Cancer
Source: PubMed Central journal article supplement (PMC6413061; doi:10.3390/ijms20040968), 2019-02-22
Supplement: ijms-20-00968-s001.pdf [file ijms-20-00968-s001.pdf]

**Table S1.** Differential chromosomal regions between each age-of-onset group, for each colon location.

|             |              | RIGHT CC    |            | LEFT CC     |            | RECTAL CANCER |            |  |
|-------------|--------------|-------------|------------|-------------|------------|---------------|------------|--|
|             |              | Early-onset | Late-onset | Early-onset | Late-onset | Early-onset   | Late-onset |  |
|             |              | %           | %          | %           | %          | %             | %          |  |
| chr1        | p36.32       | 0           | 37         |             |            |               |            |  |
|             | p36.32-36.13 |             |            |             |            | 5             | 41         |  |
|             | p36.32-36.31 | 46          | 14         | 29          | 0          |               |            |  |
|             | p36.31       | 0           | 34         |             |            |               |            |  |
|             | p36.23-36.22 |             |            |             |            | 37            | 12         |  |
|             | p36.13-36.12 |             |            |             |            | 5             | 32         |  |
|             | p35.3-35.2   | 46          | 14         |             |            |               |            |  |
|             | p35.2-34.3   | 0           | 31         |             |            | 0             | 32         |  |
|             | p34.3        | 46          | 14         |             |            |               |            |  |
|             | p32.3-22.2   | 0           | 51         |             |            |               |            |  |
|             | p21.3-11.2   | 0           | 51         |             |            |               |            |  |
|             | p12-q21.1    |             |            | 63          | 10         |               |            |  |
|             | q21.1-21.2   | 0           | 40         |             |            |               |            |  |
|             | q21.1-21.2   | 69          | 23         | 55          | 10         |               |            |  |
|             | q22-23.1     |             |            |             |            | 0             | 21         |  |
|             | q23.2-24.3   | 0           | 29         |             |            |               |            |  |
|             | q25.1-31.3   | 12          | 34         |             |            |               |            |  |
|             | q32.1-32.2   | 12          | 34         |             |            |               |            |  |
|             | q32.2        | 0           | 37         |             |            |               |            |  |
|             | q32.3        | 0           | 40         |             |            |               |            |  |
|             | q41          | 0           | 34         |             |            |               |            |  |
|             | q42.2        | 0           | 31         |             |            |               |            |  |
|             | q42.2        | 0           | 34         |             |            |               |            |  |
|             | q42.3        | 0           | 37         |             |            |               |            |  |
|             | q43          | 0           | 31         |             |            |               |            |  |
|             | chr2         | p25.2       | 0          | 51          |            |               |            |  |
|             |              | p25.1-24.1  | 0          | 43          | 41         | 5             |            |  |
|             |              | p23.2-22.2  | 0          | 37          |            |               |            |  |
|             |              | p22.1-21    | 0          | 37          |            |               |            |  |
|             |              | p16.3-16.2  | 0          | 43          |            |               |            |  |
|             |              | p16.1       | 0          | 46          |            |               |            |  |
|             |              | p14-13.3    | 0          | 40          |            |               |            |  |
|             |              | p12         | 0          | 43          |            |               |            |  |
| p11.2       |              | 54          | 20         |             |            |               |            |  |
| p11.2-11.1  |              |             |            | 48          | 10         |               |            |  |
| p11.2       |              | 0           | 37         |             |            |               |            |  |
| p11.1-q11.2 |              | 0           | 29         |             |            |               |            |  |
| q11.2-12.1  |              | 0           | 43         |             |            |               |            |  |
| q12.2-12.3  |              | 0           | 43         |             |            |               |            |  |
| q12.3-21.1  |              | 0           | 37         |             |            |               |            |  |
| q13         |              |             |            | 48          | 16         |               |            |  |
| q14.1-14.2  |              | 0           | 43         | 37          | 5          |               |            |  |
| q14.3       |              | 0           | 49         | 33          | 0          |               |            |  |
| q21.1       |              | 0           | 37         | 26          | 0          |               |            |  |
| q21.2       |              | 0           | 37         | 26          | 0          |               |            |  |
| q22.1-35    |              | 0           | 40         | 22          | 0          |               |            |  |
| q32.3       |              |             |            |             |            | 5             | 32         |  |
| q35-36.1    |              |             |            |             |            | 5             | 32         |  |

|       |              |    |    |    |    |    |    |
|-------|--------------|----|----|----|----|----|----|
| chr3  | q36.1        | 0  | 31 |    |    |    |    |
|       | q36.3        | 0  | 34 |    |    |    |    |
|       | q37.1-37.3   | 0  | 34 |    |    |    |    |
|       | p25.3        | 0  | 31 |    |    |    |    |
| chr4  | p21.31-21.1  |    |    |    |    | 42 | 32 |
|       | q26.31       |    |    | 22 | 0  |    |    |
| chr5  | q31.3        |    |    | 33 | 5  |    |    |
|       | q32.1        |    |    | 37 | 5  |    |    |
| chr6  | q13.1-13.2   |    |    | 67 | 16 |    |    |
|       | q13.2        |    |    |    |    | 5  | 53 |
| chr7  | p13.3        | 0  | 29 |    |    |    |    |
|       | p12.2-12.2   |    |    | 33 | 5  |    |    |
| chr8  | p11.2-11.1   |    |    | 44 | 11 |    |    |
|       | q25.3        | 0  | 29 |    |    |    |    |
| chr9  | p15.2        | 8  | 40 |    |    |    |    |
|       | p14.3-14.1   | 8  | 40 |    |    |    |    |
| chr10 | p13-12.3     | 8  | 46 |    |    |    |    |
|       | p12.2-11.2   | 15 | 54 |    |    |    |    |
| chr11 | q11.21       | 15 | 54 |    |    |    |    |
|       | q11.22-21.11 | 15 | 63 |    |    |    |    |
| chr12 | q21.11-21.12 | 8  | 40 |    |    |    |    |
|       | q21.13-21.1  | 8  | 51 |    |    |    |    |
| chr13 | q21.3        | 8  | 40 |    |    |    |    |
|       | q22.1-31.33  | 15 | 57 |    |    |    |    |
| chr14 | q32.3-34     | 8  | 46 |    |    |    |    |
|       | q35          | 8  | 46 |    |    |    |    |
| chr15 | p23.1-21.3   | 0  | 31 |    |    |    |    |
|       | q22.1        | 8  | 40 |    |    |    |    |
| chr16 | q24.21       | 8  | 43 |    |    |    |    |
|       | q24.21-24.22 |    |    | 44 | 11 |    |    |
| chr17 | p13.3-13.2   |    |    |    |    | 0  | 20 |
|       | p13.1        | 8  | 46 |    |    |    |    |
| chr18 | p12-11.2     | 0  | 46 |    |    |    |    |
|       | p12-q24.22   |    |    | 59 | 21 |    |    |
| chr19 | q12-13       | 0  | 51 |    |    |    |    |
|       | q21.11       | 0  | 49 |    |    |    |    |
| chr20 | q21.11-21.12 |    |    |    |    | 0  | 26 |
|       | q21.31-21.32 |    |    |    |    | 0  | 26 |
| chr21 | q31.3-33.1   |    |    | 52 | 16 |    |    |
|       | q33.2        |    |    | 22 | 0  |    |    |
| chr22 | q33.3        | 62 | 29 |    |    |    |    |
|       | q34.12-34.13 | 62 | 29 |    |    |    |    |
| chr23 | p15.3        | 0  | 34 |    |    |    |    |
|       | p15.3-15.1   |    |    |    |    | 21 | 3  |
| chr24 | p14          | 0  | 31 |    |    |    |    |
|       | p14          |    |    |    |    | 21 | 3  |
| chr25 | p12.31       |    |    |    |    | 0  | 21 |
|       | q11.21-11.22 | 0  | 40 |    |    | 8  | 23 |
| chr26 | q11.21-11.22 | 70 | 23 |    |    |    |    |
|       | q22.2-23.32  | 0  | 40 | 48 | 16 |    |    |
| chr27 | q23.32-23.33 |    |    |    |    | 21 | 3  |
|       | q23.33-24.1  |    |    |    |    | 0  | 21 |
| chr28 | q26.12-26.13 | 0  | 29 |    |    |    |    |

|       |              |    |    |    |    |    |    |
|-------|--------------|----|----|----|----|----|----|
| chr11 | q26.13-26.2  | 0  | 29 |    |    |    |    |
|       | p15.5-15.4   |    |    | 37 | 5  |    |    |
|       | p15.2        |    |    | 48 | 16 |    |    |
|       | p11.12-q12.1 |    |    | 63 | 21 |    |    |
| chr12 | q14.1-14.3   |    |    | 59 | 21 |    |    |
|       | q24.13-24.3  | 0  | 37 |    |    |    |    |
|       | p13.31       | 8  | 40 |    |    |    |    |
|       | p13.2-13.1   | 0  | 31 |    |    |    |    |
|       | p12.3        | 0  | 29 |    |    |    |    |
|       | p12.2        | 0  | 29 |    |    |    |    |
|       | p12.1        | 0  | 29 |    |    |    |    |
|       | p11.21       | 0  | 37 |    |    |    |    |
|       | q24.13-24.32 | 0  | 31 |    |    |    |    |
|       | q24.32-24.33 | 0  | 31 |    |    |    |    |
| chr13 | q11          | 8  | 51 |    |    |    |    |
|       | q12.11-12.13 | 8  | 46 |    |    |    |    |
|       | q12.2-12.3   | 8  | 40 |    |    |    |    |
|       | q14.11-14.13 | 8  | 43 |    |    |    |    |
|       | q14.2-14.3   | 8  | 40 |    |    |    |    |
|       | q31.3-32.3   | 8  | 49 |    |    |    |    |
|       | q11.1-11.2   | 85 | 37 |    |    |    |    |
| chr14 | q11.22       |    |    | 44 | 5  |    |    |
|       | q12          | 8  | 40 |    |    |    |    |
| chr15 | p11.1-q11.2  |    |    | 0  | 26 |    |    |
|       | q11.2        | 8  | 40 |    |    |    |    |
| chr16 | q14          | 8  | 46 |    |    |    |    |
|       | q15.3        | 8  | 43 |    |    |    |    |
|       | q21.1        | 8  | 46 |    |    |    |    |
|       | q21.2-26.3   | 0  | 37 |    |    |    |    |
|       | p13.3        | 0  | 29 |    |    |    |    |
|       | p13.12-13.11 | 54 | 11 |    |    |    |    |
|       | p12.2-p11.2  | 31 | 6  |    |    |    |    |
|       | q12.1-q22.1  | 0  | 31 |    |    |    |    |
|       | q21          |    |    |    |    | 21 | 3  |
|       | q23.1-q23.3  | 0  | 29 |    |    |    |    |
| chr17 | p13.3        |    |    | 44 | 11 |    |    |
|       | p13.3        |    |    |    |    | 0  | 24 |
|       | p13.1-12     |    |    | 30 | 0  |    |    |
|       | p11.2        | 62 | 29 |    |    |    |    |
|       | q22-23.1     |    |    | 48 | 16 |    |    |
| chr18 | q24.2-24.3   | 0  | 29 |    |    |    |    |
|       | p11.32-11.21 | 0  | 54 |    |    |    |    |
|       | p11.31-11.22 |    |    |    |    | 21 | 3  |
|       | q11.2-12.3   | 8  | 49 |    |    |    |    |
|       | q21.1-21.2   | 8  | 51 |    |    |    |    |
|       | q21.31-21.33 | 8  | 54 |    |    |    |    |
|       | q22.1-23     | 8  | 46 |    |    |    |    |
| chr19 | p13.12-12    | 0  | 31 | 59 | 26 |    |    |
|       | q13.12       |    |    | 48 | 16 |    |    |
| chr20 | p12.2-11.23  | 0  | 29 |    |    |    |    |
| chr21 | q22.3        | 62 | 26 |    |    |    |    |
|       | q22.3        | 0  | 29 |    |    |    |    |
| chr22 | q13.31-13.32 | 0  | 29 |    |    |    |    |

CC: Colon Cancer; Chr: chromosome. Green: gained regions. Red: lost regions. Percentages shown in bold indicate frequencies that are at least twice as high in one age-of-onset group as in the other.
